# Supplementary material for: Inhibition of Biofilm Formation in Cutibacterium acnes, Staphylococcus aureus, and Candida albicans by the Phytopigment Shikonin
Source: MDPI journal article supplement (doi:10.3390/ijms25042426), 2024-02-19
Supplement: s1 [file s1]

**Table S1.** qRT-PCR primer sequences used for *C. acnes*.

| Gene            | Description                               | Primer                                                                                   |
|-----------------|-------------------------------------------|------------------------------------------------------------------------------------------|
| PPA0721         | Invasion-associated protein p60           | Forward 5'-AGA AGA AGG AAC AGG AGG CC-3'<br>Reverse 5'-TCA GGA ATC GGC ACT TGA CT-3'     |
| PPA1796         | Lipase                                    | Forward 5'-CTC AAG GTT CGT GAA CGA GT-3'<br>Reverse 5'-GCC ATA GAG CTC CTT GTT GA-3'     |
| PPA2105         | Lipase                                    | Forward 5'-GAT TTC CTT AGC ACG TGG AG-3'<br>Reverse 5'-GAT GAC GGT GTA GGC GAT AC-3'     |
| PPA380          | Hyaluronate lyase                         | Forward 5'-CGC TCT GAA GGA TTC GTC-3'<br>Reverse 5'-GTC GTG CAG GAT ACA CAT GA-3'        |
| <i>hly</i>      | Hyaluronate lyase                         | Forward 5'-CAA CAT CGC CGT GTT TAT TG-3'<br>Reverse 5'-CCC ATG ACG ACG TAG AGG AT-3'     |
| PPA0149         | Glycosyltransferase                       | Forward 5'-AGT ACA TGG CTT CCC GAG TG-3'<br>Reverse 5'-CTT GGG ACT CGA AGT TGA GC-3'     |
| <i>btuR</i>     | Cobinamide/cobalam in adenosyltransferase | Forward 5'-GGA AGA TGC TCT TCG GGC GCT-3'<br>Reverse 5'-GCC TCA GGG TTC TCC GCA GC-3'    |
| <i>cbiL</i>     | Precorrin-2 C(20)-methyltransferase       | Forward 5'-GCG CGA GGC AGA CGT GAT CC-3'<br>Reverse 5'-GAC ACC GGA CCT CTC CCG CA-3'     |
| <i>roxP</i>     | Radical oxygenase                         | Forward 5'-GCA TCT AGC CCT CTC ACC AT-3'<br>Reverse 5'-CTG AGA GTC CGG TAG GTG GT-3'     |
| <i>tly</i>      | Lysis of red blood cells                  | Forward 5'-CAG GAC GTG ATG GCA ATG CGA-3'<br>Reverse 5'-TCG TTC ACA AGA CCA CAG TAG C-3' |
| PPA0349         | Polysaccharide capsule biosynthesis       | Forward 5'-CTT CTT CGT CGA CCA GTT CC-3'<br>Reverse 5'-TCA GCT GTC TCG TCA ACA CC-3'     |
| <i>16s rRNA</i> | 16S ribosomal RNA (Housekeeping gene)     | Forward 5'-GGG GCT TAA CCC TGA GCG TGC-3'<br>Reverse 5'-TTC GCT CCC CAC GCT TTC GC-3'    |

**Table S2.** qRT-PCR primer sequences used for *S. aureus*.

| Gene            | Name                              | Primer                                                |
|-----------------|-----------------------------------|-------------------------------------------------------|
| <i>agrA</i>     | Quorum-sensing regulator A        | Forward 5'-TGA TAA TCC TTA TGA GGT GCT T-3'           |
|                 |                                   | Reverse 5'-CAC TGT GAC TCG TAA CGA AAA-3'             |
| <i>aur</i>      | Zinc metalloproteinase aureolysin | Forward 5'-ACC GTG TGT TAA TTC GTG TGC TA-3'          |
|                 |                                   | Reverse 5'-ATG GTC GCA CAT TCA CAA GTT T-3'           |
| <i>hla</i>      | $\alpha$ -Hemolysin               | Forward 5'-CGG CAC ATT TGC ACC AAT AAG GC-3'          |
|                 |                                   | Reverse 5'-GGT TTA GCC TGG CCT TCA GC-3'              |
| <i>icaA</i>     | Intercellular adhesion A          | Forward 5'-TGA ACC GCT TGC CAT GTG-3'                 |
|                 |                                   | Reverse 5'-CAC GCG TTG CTT CCA AAG A-3'               |
| <i>nucI</i>     | Nuclease                          | Forward 5'-CAC CTG AAA CAA AGC ATC CTA A-3'           |
|                 |                                   | Reverse 5'-TAT ACG CTA AGC CAC GTC CAT-3'             |
| <i>RNAIII</i>   | Transcriptional regulator         | Forward 5'-ATC GAC ACA GTG AAC AAA TTC AC-3'          |
|                 |                                   | Forward 5'-CTC TAC TAG CAA ATG TTA CTC AC-3'          |
| <i>saeR</i>     | Response regulator                | Forward 5'-GCC TTA ACT TTA GGT GCA GAT GAC TAT GTC-3' |
|                 |                                   | Forward 5'-CGA CAG TTG TTC AAC TGG TTG ATG ATG G-3'   |
| <i>sarA</i>     | Transcriptional regulator         | Forward 5'-GAG TTG TTA TCA ATG GTC-3'                 |
|                 |                                   | Reverse 5'-GTT TGC TTC AGT GAT TCG-3'                 |
| <i>seb</i>      | Enterotoxin B                     | Forward 5'-TGT TCG GGT ATT TGA AGA TGG -3'            |
|                 |                                   | Reverse 5'-CGT TTC ATA AGG CGA GTT GTT-3'             |
| <i>sigB</i>     | RNA Polymerase sigma factor       | Forward 5'-AAG TGA TTC GTA AGG ACG TCT-3'             |
|                 |                                   | Reverse 5'-TCG ATA ACT ATA ACC AAA GCC T-3'           |
| <i>spa</i>      | Protein A                         | Forward 5'-ACC AGA AAC TGG TGA AGA AAA TCC-3'         |
|                 |                                   | Reverse 5'-TAA CGC TGC ACC TAA GGC TAA TG-3'          |
| <i>16s rRNA</i> | A component of ribosomes          | Forward 5'-TGT TTG ACG ATG TTT GAG CA-3'              |
|                 |                                   | Reverse 5'-CCT TCC TCC AGT TCA GAT GC -3'             |

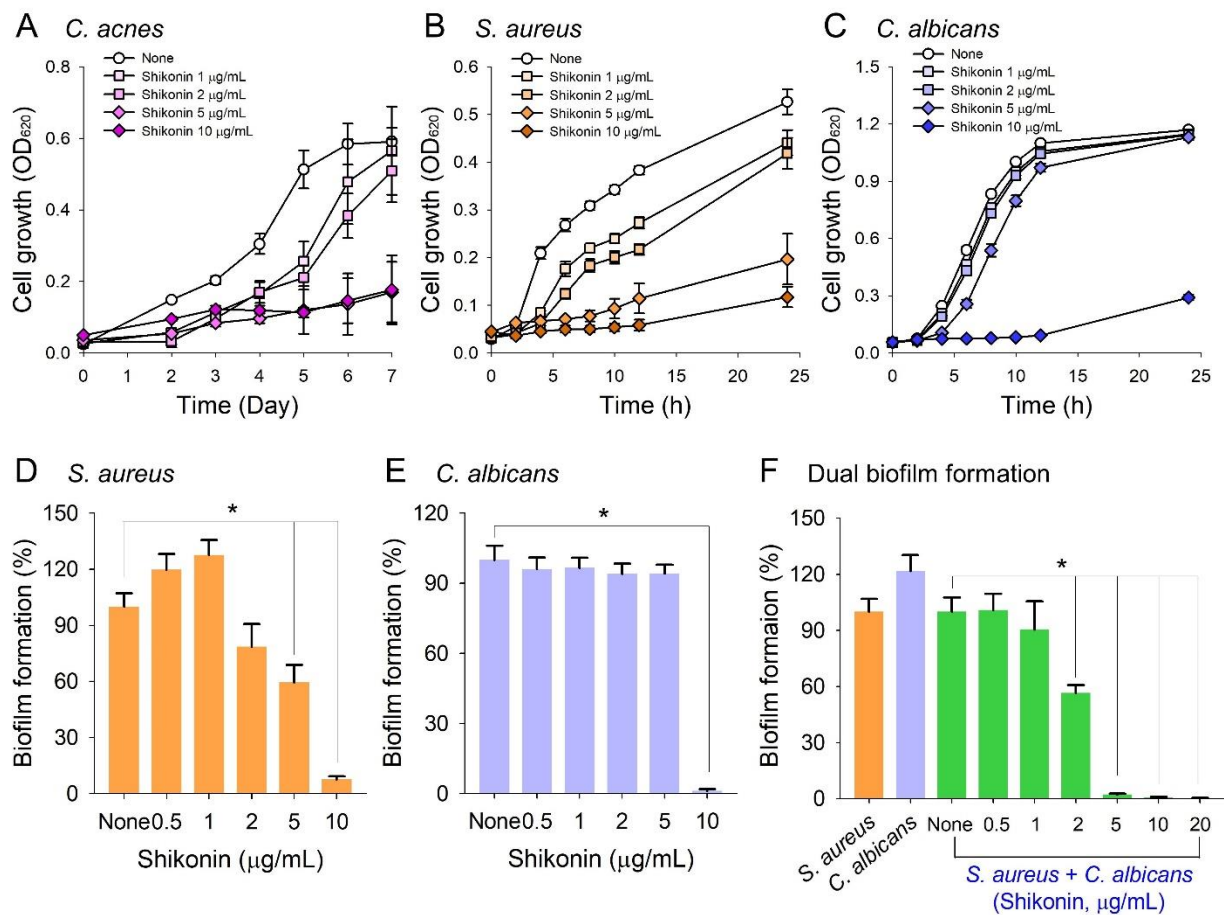

**Figure S1.** Planktonic cell growths of (A) *C. acnes*, (B) *S. aureus*, and (C) *C. albicans* in the presence of shikonin under anaerobic conditions in 96-well plates. Biofilm formations by the (D, E) two microbes separately and (F) mixed microbes after culture for 1 day under aerobic conditions.

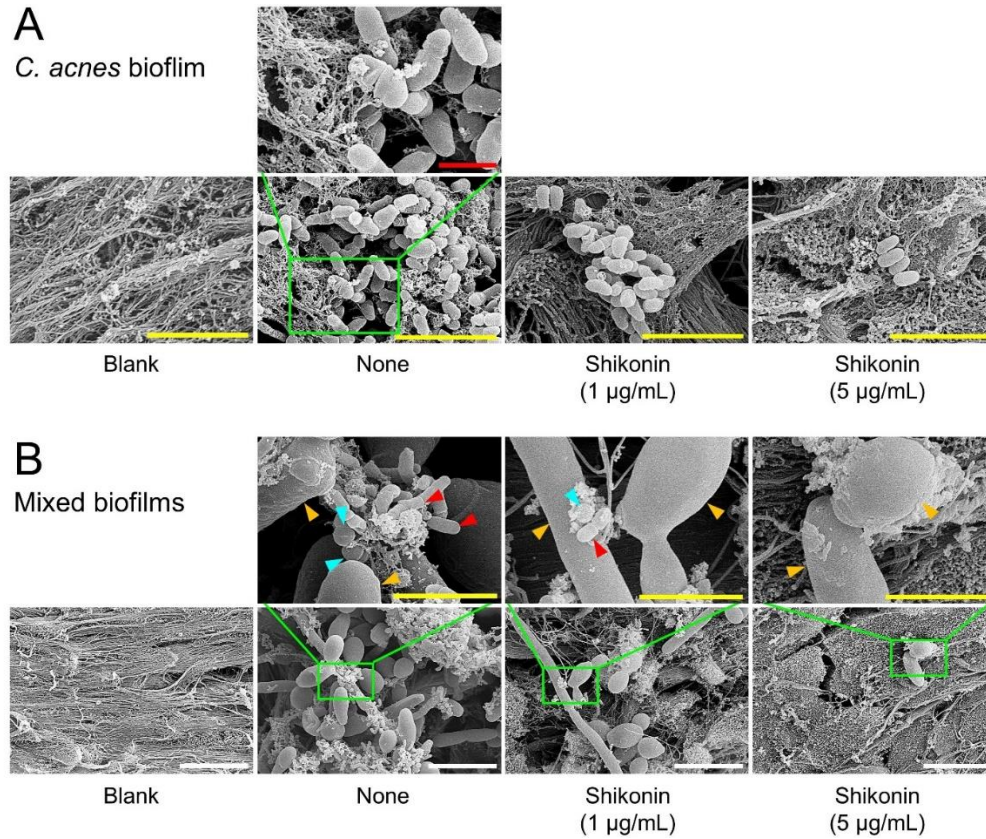

**Figure S2.** Prevention of biofilm formation on porcine skin. Inhibitory effects of shikonin on biofilm development by (A) *C. acnes* and (B) *C. acnes*/*S. aureus*/*C. albicans* on porcine skin. SEM was used to observe biofilms after 7 days of culture under anaerobic conditions. Yellow, red, and white scale bars indicate 4, 1, and 10  $\mu\text{m}$ , respectively. Red, cyan, and orange arrowheads indicate *C. acnes*, *S. aureus*, and *C. albicans* cells, respectively.

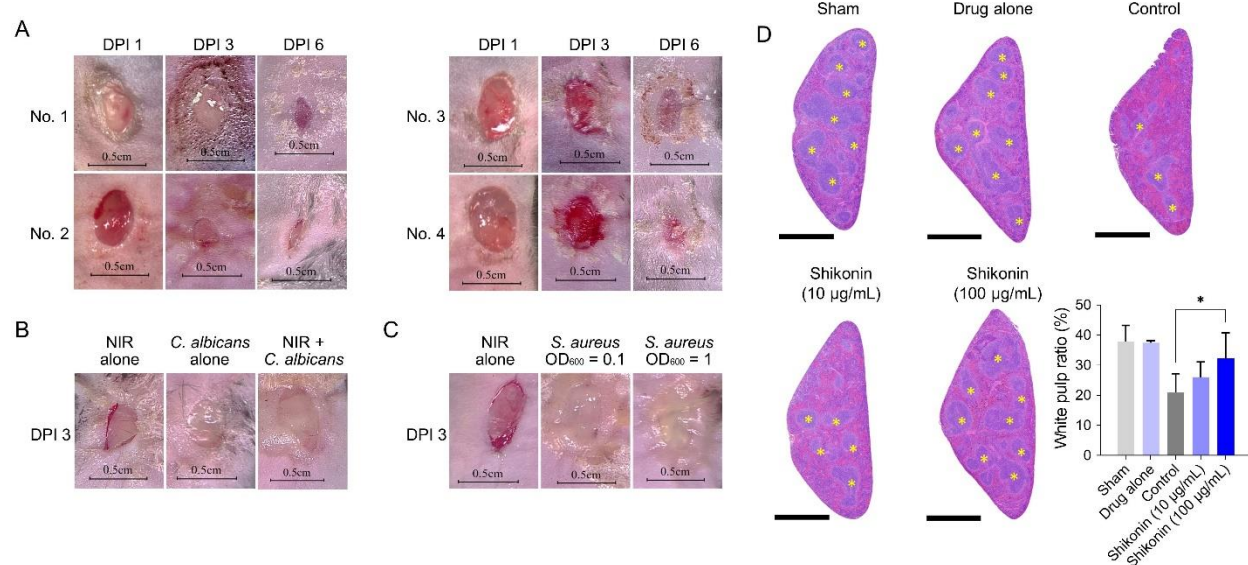

**Figure S3.** (A) Images of lesions induced by *C. albicans* or *S. aureus* with or without burning. *C. albicans* infection without burning did not result in inflammatory lesion progression at DPI 6. NIR application aggravated skin inflammation induced by (B) *C. albicans* of OD<sub>600</sub> = 1 ( $3 \times 10^5$  CFU) and (C) *S. aureus* of OD<sub>600</sub> = 0.1 ( $3 \times 10^6$  CFU) and 1 ( $3 \times 10^7$  CFU). (D) Spleen histopathology after infecting wounds with *S. aureus* and *C. albicans* after DPI 12. Percentage white pulp areas (asterisk) are shown in the bar chart. Scale bars represent 1 mm. Means  $\pm$  standard deviations of at least 3 animals are presented. \*,  $p < 0.05$  vs. infected non-treated controls.
